# Supplementary material for: Short-term outcomes of robot-assisted versus conventional laparoscopic surgery for mid and low rectal cancer after neoadjuvant chemoradiotherapy: a propensity score-matched analysis
Source: Research Square preprint supplement (doi:10.21203/rs.3.rs-1646471/v1), 2022-05-16
Supplement: Supplementary file 1 [file 338faeb338ca07826b8a5849.xlsx]

## Sheet: AV
Table 4 Pathology findings before and after matching
	Overall cohort (N = 111)					Propensity score-matched pairs (N = 60)
	RALS group (n = 30)		CLS group (n = 81)			RALS group (n = 30)		CLS group (n = 30)
Characteristics	n (%) or mean ± SD or median [range]			p		n (%) or mean ± SD or median [range]			p
Tumor size, mm	29 [5-71]		27 [3-120]	0.6397		29 [5-71]		36 [5-105]	0.2798
Histological grade				0.6631					0.6394
G1-2 (pap/tub)a	27 (90.0)		75 (92.6)			27 (90.0)		28 (93.3)
G3 (muc/por/sig)b	3 (10.0)		6 (7.4)			3 (10.0)		2 (6.7)
Lymphatic invasion				0.423					0.7174
Present	4 (13.3)		16 (19.8)			4 (13.3)		5 (16.7)
Absent	26 (86.7)		65 (80.2)			26 (86.7)		25 (83.3)
Vascular invasion				0.0377					0.0185
Present	9 (30.0)		42 (51.9)			9 (30.0)		18 (60.0)
Absent	21 (70.0)		39 (48.1)			21 (70.0)		12 (40.0)
Proximal margin, mm	178.3 ± 61.6		186.6 ± 51.2	0.474		178.3 ± 61.6		201.9 ± 57.2	0.1289
Distal margin, mm	34.7 ± 16.1		32.1 ± 18.2	0.4978		34.7 ± 16.1		35.6 ± 15.8	0.8279
Positive radial margin	1 (3.3)		4 (4.9)	0.7091		1 (3.3)		1 (3.3)	1
Number of lymph nodes dissected	13.7 ± 9.0		11.4 ± 7.7	0.1771		13.7 ± 9.0		12.3 ± 7.0	0.5045
yp T category				0.4721					0.9006
T0 / Tis	4 (13.3)		11 (13.6)			4 (13.3)		3 (10.0)
T1	4 (13.3)		5 (6.2)			4 (13.3)		3 (10.0)
T2	4 (13.3)		22 (27.2)			4 (13.3)		6 (20.0)
T3	16 (53.3)		37 (45.7)			16 (53.3)		17 (56.7)
T4	2 (6.7)		6 (7.4)			2 (6.7)		1 (3.3)
yp N category				0.9254					0.486
N0	21 (70.0)		54 (66.7)			21 (70.0)		18 (60.0)
N1	6 (20.0)		19 (23.5)			6 (20.0)		10 (33.3)
N2	3 (10.0)		8 (9.9)			3 (10.0)		2 (6.7)
yc/yp M category				0.0414					0.2904
M0	27 (90.0)		80 (98.8)			27 (90.0)		29 (96.7)
M1	3 (10.0)		1 (1.2)			3 (10.0)		1 (3.3)
yp Stagec				0.2729					0.642
0 / I	9 (30.0)		19 (23.5)			9 (30.0)		6 (20.0)
II	8 (26.7)		26 (32.1)			8 (26.7)		9 (30.0)
III	8 (26.7)		27 (33.3)			8 (26.7)		12 (40.0)
IV	3 (10.0)		1 (1.2)			3 (10.0)		1 (3.3)
pCR	2 (6.7)		8 (9.9)			2 (6.7)		2 (6.7)
Treatment effect				0.9823					0.9602
Grade 1	17 (56.7)		46 (56.8)			17 (56.7)		18 (60.0)
Grade 2	10 (33.3)		26 (32.1)			10 (33.3)		9 (30.0)
Grade 3	3 (10.0)		9 (11.1)			3 (10.0)		3 (10.0)
a Papillary adenocarcinoma/Well or moderately differentiated tubular adenocarcinoma
b Mucinous adenocarcinoma/Poorly differentiated adenocarcinoma/Signet-ring cell carcinoma
c Post-CRT pathological stage, TNM classification of malignant tumors, eighth edition
RALS robot-assisted laparoscopic surgery, CLS conventional laparoscopic surgery, pCR pathological complete response
