# Supplementary material for: Short-term outcomes of robot-assisted versus conventional laparoscopic surgery for mid and low rectal cancer after neoadjuvant chemoradiotherapy: a propensity score-matched analysis
Source: Research Square preprint supplement (doi:10.21203/rs.3.rs-1646471/v1), 2022-05-16
Supplement: Supplementary file 2 [file 3b84f30ffd3668a9ab36a3de.xlsx]

## Sheet: AV
Table 1 Baseline characteristics before and after matching
	Overall cohort (N = 111)					Propensity score-matched pairs (N = 60)
	RALS group (n = 30)		CLS group (n = 81)			RALS group (n = 30)		CLS group (n = 30)
Characteristics	n (%) or mean ± SD or median [range]			p		n (%) or mean ± SD or median [range]			p
Age, years	62.4 ± 11.0		62.5 ± 10.2	0.9697		62.4 ± 11.0		61.7 ± 10.3	0.7913
Sex				0.0796					0.4872
male	24 (80.0)		51 (63.0)			24 (80.0)		26 (86.7)
female	6 (20.0)		30 (37.0)			6 (20.0)		4 (13.3)
Body mass index, kg/m2	22.4 ± 2.7		23.2 ± 4.1	0.3186		22.4 ± 2.7		22.7 ± 3.1	0.661
ASA score				0.9168					0.4586
1	7 (23.3)		16 (19.8)			7 (23.3)		7 (23.3)
2	21 (70.0)		59 (72.8)			21 (70.0)		18 (60.0)
3	2 (6.7)		6 (7.4)			2 (6.7)		5 (16.7)
Pre-CRT CEA level, ng/ml	7.4 [0.7-57.8]		4.8 [0.3-768.0]	0.1592		7.4 [0.7-57.8]		4.7 [1.0-768.0]	0.5945
Preoperative CEA level, ng/ml	2.8 [0.4-111.0]		2.3 [0.4-104]	0.1043		2.8 [0.4-111.0]		2.7 [0.7-104.0]	0.5104
Tumor distance from anal verge, mm	46.1 ± 16.4		52.6 ± 16.9	0.0712		46.1 ± 16.4		47.4 ± 16.5	0.7663
Tumor location				0.5107					1
Mid rectuma	4 (13.3)		15 (18.5)			4 (13.3)		4 (13.3)
Lower rectumb	26 (86.7)		66 (81.5)			26 (86.7)		26 (86.7)
cT category				0.1678					0.5178
T3	23 (76.7)		71 (87.7)			23 (76.7)		25 (83.3)
T4	7 (23.3)		10 (12.4)			7 (23.3)		5 (16.7)
cN category				0.4897					0.8335
N0	17 (56.7)		36 (44.4)			17 (56.7)		16 (53.3)
N1	8 (26.7)		30 (37.0)			8 (26.7)		10 (33.3)
N2	5 (16.7)		15 (18.5)			5 (16.7)		4 (13.3)
cM category				n.a					n.a
M0	30 (100.0)		81 (100.0)			30 (100.0)		30 (100.0)
M1	0 (0.0)		0 (0.0)			0 (0.0)		0 (0.0)
cStagec				0.2521					0.7952
II	17 (56.7)		36 (44.4)			17 (56.7)		16 (53.3)
III	13 (43.3)		45 (55.6)			13 (43.3)		14 (46.7)
ycT category				0.1723					0.4676
T1	2 (6.7)		3 (3.7)			2 (6.7)		1 (3.3)
T2	13 (43.3)		20 (24.7)			13 (43.3)		9 (30.0)
T3	13 (43.3)		54 (66.7)			13 (43.3)		19 (63.3)
T4	2 (6.7)		4 (4.9)			2 (6.7)		1 (3.3)
ycN category				0.3479					0.6584
N0	20 (66.7)		57 (70.4)			20 (66.7)		23 (76.7)
N1	8 (26.7)		23 (28.4)			8 (26.7)		6 (20.0)
N2	2 (6.7)		1 (1.2)			2 (6.7)		1 (3.3)
ycM category				0.1462					0.55
M0	28 (93.3)		80 (98.8)			28 (93.3)		29 (96.7)
M1	2 (6.7)		1 (1.2)			2 (6.7)		1 (3.3)
ycStaged				0.1117					0.522
I	11 (36.7)		20 (24.7)			11 (36.7)		10 (33.3)
II	7 (23.3)		36 (44.4)			7 (23.3)		12 (40.0)
III	10 (33.3)		24 (29.6)			10 (33.3)		7 (23.3)
IV	2 (6.7)		1 (1.2)			2 (6.7)		1 (3.3)
a A mid rectal tumor was defined as one in which the lower border of the tumor was located proximal to the peritoneal reflection
b A low rectal tumor was defined as one in which the lower border of the tumor was located distal to the peritoneal reflection
c Pre-CRT clinical stage, TNM classification of malignant tumors, eighth edition
d Post-CRT clinical stage, TNM classification of malignant tumors, eighth edition
RALS robot-assisted laparoscopic surgery, CLS conventional laparoscopic surgery, ASA American Society of Anesthesiologists, CRT chemoradiotherapy
CEA carcinoembryonic antigen, n.a not applicable
