# Supplementary material for: Short-term outcomes of robot-assisted versus conventional laparoscopic surgery for mid and low rectal cancer after neoadjuvant chemoradiotherapy: a propensity score-matched analysis
Source: Research Square preprint supplement (doi:10.21203/rs.3.rs-1646471/v1), 2022-05-16
Supplement: Supplementary file 5 [file ad073f666df2cb1cd4ef3721.xlsx]

## Sheet: AV
Table 3 Postoperative complications before and after matching
	Overall cohort (N = 111)					Propensity score-matched pairs (N = 60)
	RALS group (n = 30)		CLS group (n = 81)			RALS group (n = 30)		CLS group (n =30)
Characteristics	n (%)			p		n (%)			p
Patient number, CD classification ≥ Grade II	3 (10.0)		27 (33.3)	0.0085		3 (10.0)		10 (33.3)	0.025
Anastomotic leakage	0 (0.0a)		8 (20.5a)	0.0201		0 (0.0a)		2 (25.0a)	0.0358
Small bowel obstruction	1 (3.3)		5 (6.2)	0.538		1 (3.3)		2 (6.7)	0.55
Wound infection	2 (6.7)		9 (11.1)	0.4703		2 (6.7)		5 (16.7)	0.221
Urinary retention	0 (0.0)b		5 (6.2)b	0.072		0 (0.0)b		2 (6.7)b	0.0919
Pelvic abscess	0 (0.0)		2 (2.5)	0.259		0 (0.0)		1 (3.3)	0.2362
Ureter injury	1 (3.3)		0 (0.0)	0.1041		1 (3.3)		0 (0.0)	0.2362
Urethral injury	0 (0.0)		1 (1.2)	0.4261		0 (0.0)		0 (0.0)	n.a
Diarrhea	0 (0.0)		1 (1.2)	0.4261		0 (0.0)		0 (0.0)	n.a
Gastric ulcer	0 (0.0)		1 (1.2)	0.4261		0 (0.0)		0 (0.0)	n.a
Bleeding	0 (0.0)		0 (0.0)	n.a		0 (0.0)		0 (0.0)	n.a
Pneumonia	0 (0.0)		0 (0.0)	n.a		0 (0.0)		0 (0.0)	n.a
CD classification ≥ Grade III	2 (6.7)		8 (9.9)	0.5894		2 (6.7)		3 (10.0)	0.6394
Reoperation	1 (3.3)		1 (1.2)	0.4866		1 (3.3)		1 (3.3)	1
30-day postoperative mortality	0 (0.0)		0 (0.0)	n.a		0 (0.0)		0 (0.0)	n.a
a Data were analyzed in patients with low anterior resection
b Data were analyzed in patients who had urinary retention with CD grade ≥ I
RALS robot-assisted laparoscopic surgery, CLS conventional laparoscopic surgery, CD Clavien-Dindo, n.a not applicable
