# Supplementary material for: Short-term outcomes of robot-assisted versus conventional laparoscopic surgery for mid and low rectal cancer after neoadjuvant chemoradiotherapy: a propensity score-matched analysis
Source: Research Square preprint supplement (doi:10.21203/rs.3.rs-1646471/v1), 2022-05-16
Supplement: Supplementary file 6 [file e8a9151e4b089f0e425d1a2d.xlsx]

## Sheet: AV
Table 2 Operative results before and after matching
	Overall cohort (N = 111)					Propensity score-matched pairs (N = 60)
	RALS group (n = 30)		CLS group (n = 81)			RALS group (n = 30)		CLS group (n = 30)
Characteristics	n (%) or median [range]			p		n (%) or median [range]			p
Type of operation				0.8896					0.1063
Low anterior resection	14 (46.7)		39 (48.1)			14 (46.7)		8 (26.7)
Abdominoperineal resection	16 (53.3)		42 (51.9)			16 (53.3)		22 (73.3)
Lateral lymph node dissection	4 (13.3)		19 (23.5)	0.2263		4 (13.3)		7 (23.3)	0.3143
Diverting ileostomy	14 (100.0a)		39 (100.0a)	n.a		14 (100.0a)		8 (100.0a)	n.a
Blood flow testing using ICG	14 (100.0a)		4 (10.3a)	< 0.0001		14 (100.0a)		0 (0.0a)	< 0.0001
Operative time, min	365 [237-692]		341 [190-732]	0.1155		365 [237-692]		351 [210-732]	0.3328
Blood loss, ml	103 [5-627]		73 [5-1275]	0.5722		103 [5-627]		124 [5-1275]	0.4321
Transfusion	0 (0.0)		0 (0.0)	n.a		0 (0.0)		0 (0.0)	n.a
Conversion to laparotomy	0 (0.0)		1 (1.2)	0.4261		0 (0.0)		1 (3.3)	0.2362
Combined resection	2 (6.7)		5 (6.2)	0.9247		2 (6.7)		1 (3.3)	0.55
Time to soft diet, days	1 [1-1]		3 [1-28]	< 0.0001		1 [1-1]		3 [1-28]	< 0.0001
Postoperative hospital stay, days	9 [7-51]		12 [7-35]	0.0005		9 [7-51]		12 [8-35]	0.0011
a Data were analyzed in patients with low anterior resection
RALS robot-assisted laparoscopic surgery, CLS conventional laparoscopic surgery, n.a not applicable, ICG indocyanine green
